# Supplementary material for: CoP-modified CdS for enhanced stability and photocatalytic hydrogen production under visible light
Source: Royal Society of Chemistry journal article supplement (doi:10.1039/d3cp01525d), 2023-01-01
Supplement: d3cp01525d1.pdf [file d3cp01525d1.pdf]

## Supporting Information

### **CoP-modified CdS for enhanced stability and photocatalytic hydrogen production under visible light**

Zijun Li<sup>a#</sup>, Yiqiao Wang<sup>a#</sup>, Yongping Luo<sup>b</sup>, Rui Xiao<sup>a</sup>, Hao Ye<sup>a</sup>, Yu Xie<sup>a\*</sup>, Yongcun

Ma<sup>a</sup>, Yong Chen<sup>a</sup>, Yun Ling<sup>a</sup>

<sup>a</sup> College of Environment and Chemical Engineering, Nanchang Hangkong University,

Nanchang 330063, China

<sup>b</sup> School of Intelligent Manufacturing, Huzhou College, Huzhou 313000, China

\*Corresponding authors E-mail addresses: xieyu\_121@163.com (Y. Xie)

Tel.: +86(791) 83953408, Fax: +86(791) 83953373

# These authors contributed equally to this work.

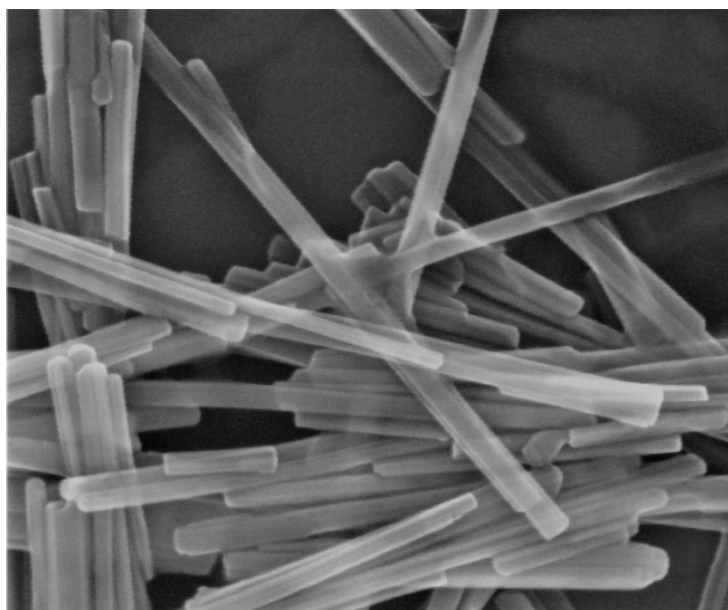

Fig. S1 SEM image of CdS

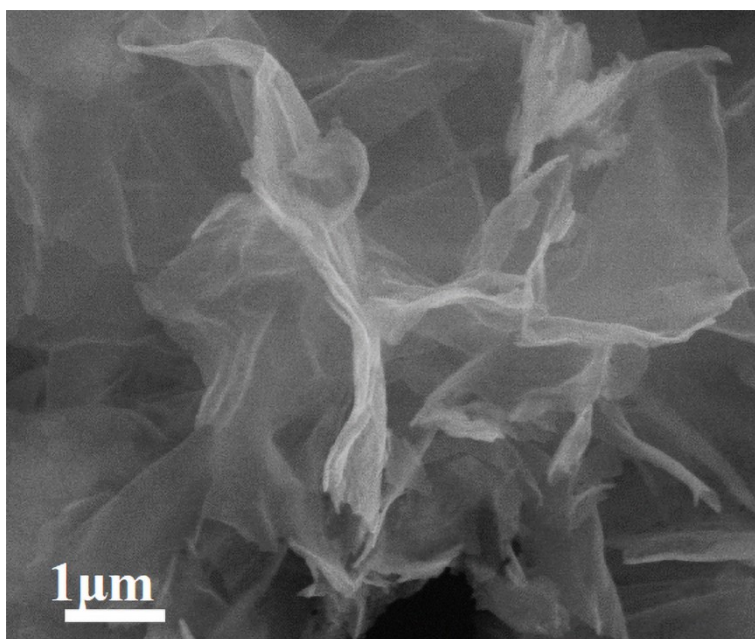

Fig. S2 SEM image of CoP

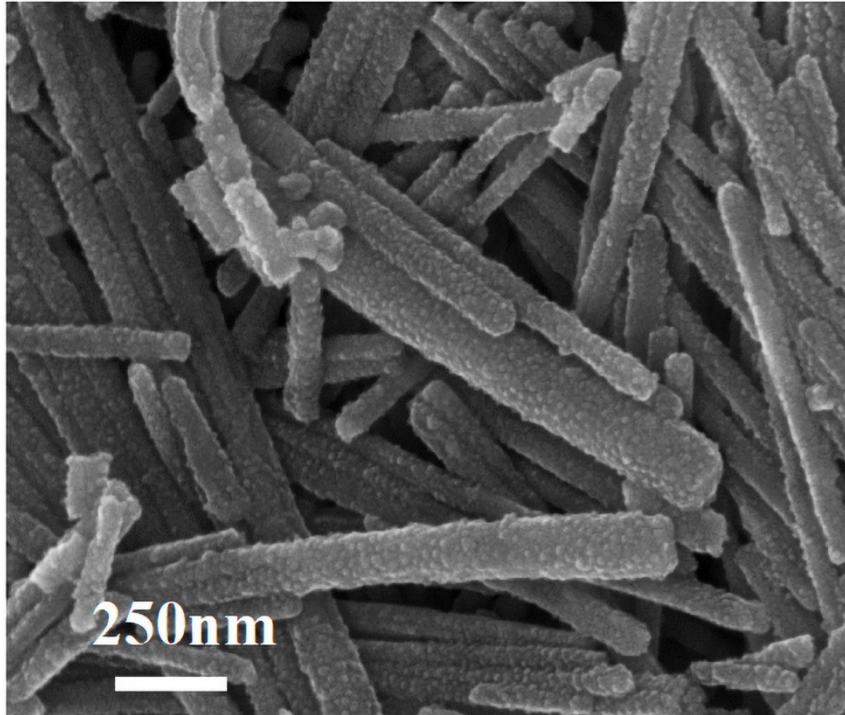

Fig. S3 SEM image of 10% CoP/CdS

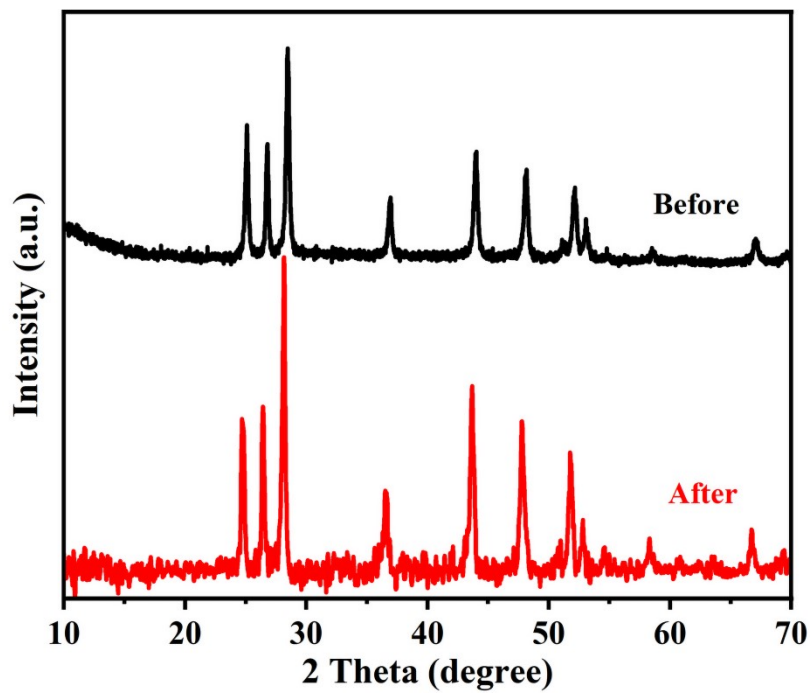

Fig. S4 XRD plot of 10% CoP/CdS before and after cycles

Table S1 The EDX of CoP

| <b>Element</b> | <b>Atomic Fraction (%)</b> | <b>Atomic Error (%)</b> | <b>Mass Fraction (%)</b> | <b>Mass Error (%)</b> | <b>Fit error (%)</b> |
|----------------|----------------------------|-------------------------|--------------------------|-----------------------|----------------------|
| Co             | 53.04                      | 7.12                    | 37.25                    | 3.13                  | 0.16                 |
| P              | 46.96                      | 8.88                    | 62.75                    | 9.88                  | 0.13                 |

Table S2 Comparison of 10% CoP/CdS photocatalytic hydrogen production performance with other CdS-based photocatalytic materials

| <b>Catalyst</b>                        | <b>Condition</b>                                | <b>Performance (<math>\mu\text{molh}^{-1}\text{g}^{-1}</math>)</b> | <b>Reference</b> |
|----------------------------------------|-------------------------------------------------|--------------------------------------------------------------------|------------------|
| TiO <sub>2</sub> /CdS                  | $\lambda > 365 \text{ nm}$                      | 1028                                                               | [S1]             |
| V <sub>2</sub> O <sub>5</sub> /CdS/CuS | $\lambda > 420 \text{ nm}$                      | 1457.1                                                             | [S2]             |
| Co-N-C/CdS                             | $\lambda > 420 \text{ nm}$                      | 905                                                                | [S3]             |
| CdS/Cu <sub>2</sub> S/SiO <sub>2</sub> | $\lambda > 420 \text{ nm}$                      | 1197                                                               | [S4]             |
| SrTiO <sub>3</sub> /CdS                | $\lambda > 420 \text{ nm}$                      | 4537.9                                                             | [S5]             |
| <b>10% CoP/CdS</b>                     | <b><math>\lambda &gt; 420 \text{ nm}</math></b> | <b>4430</b>                                                        | <b>This work</b> |

Table S3 The AQY of all samples at 420 nm

| <b>Sample</b> | <b>CdS</b> | <b>CoP</b> | <b>8% CoP/CdS</b> | <b>10% CoP/CdS</b> | <b>12% CoP/CdS</b> |
|---------------|------------|------------|-------------------|--------------------|--------------------|
| AQY (%)       | 0.26       | 0          | 1.30              | 5.29               | 2.48               |

## References

- [S1] A.Y. Meng, B.C. Zhu, B. Zhong, L.Y. Zhang and B. Cheng, Direct Z-scheme TiO<sub>2</sub>/CdS hierarchical photocatalyst for enhanced photocatalytic H<sub>2</sub>-production activity, *Appl. Surf. Sci.*, 2017, **422**, 518-527.
- [S2] H.L. Fan, S.W. Sun, J.X. Ba, H. Cheng, C.Q. Xu, Y.H. Wang, J.C. Li, H.R. Fang, M.J. Li and D.H. Fan, Constructing V<sub>2</sub>O<sub>5</sub>/CdS/CuS multi-level heterojunction for efficient photocatalytic hydrogen evolution, *Int. J. Hydrogen Energ.*, 2023, in press.
- [S3] K. Wu, C.L. Wu, W.O. Bai, N. Li, Y.Q. Gao and L. Ge, CdS supported on ZIF-67-derived Co-N-C as efficient nano polyhedron photocatalysts for visible light induced hydrogen production, *Colloid Surface A*, 2023, **663**, 131089.
- [S4] H.Y. Yu, H.O. Liang, J. Bai and C.P. Li, Sulfur vacancy and CdS phase transition synergistically boosting one-dimensional CdS/Cu<sub>2</sub>S/SiO<sub>2</sub> hollow tube for photocatalytic hydrogen evolution, *Int. J. Hydrogen Energ.*, 2023, **48**, 15908-15920.
- [S5] L.Q. Yu, X. Li, L.J. Duan, Y.P. Zhang and H.F. Zhu, Oxygen Vacancies-Induced Dendritic SrTiO<sub>3</sub>/CdS p-n Heterostructures Photocatalyst for Ultrahigh Hydrogen Evolution, *Solar RL*, 2023, in press, 2300259.
